# Supplementary material for: Explainable Machine Learning with Bayesian Hyper-Optimization for Predicting Cognitive Impairment from Longitudinal Nursing Home Data
Source: Research Square preprint supplement (doi:10.21203/rs.3.rs-7402937/v1), 2025-09-16
Supplement: Supplementary file 1 [file a2b4a6de03b6527157976688.docx]

**Supplementary Material S2.** Description of the variables found in the Fall Records IS.

| Variable | Description |
| --- | --- |
| Id_AccompanimentFall | Accompanied by Family/Caregiver |
| Accompanied by Professionals |
| Other |
| Alone |
| *Id_ActivityFall* | Unknown |
| While picking something up off the floor |
| Walking |
| From the bed |
| From the chair/armchair |
| Bed transfer |
| WC transfer |
| Other (specify) |
| Chair transfer |
| Shower transfer |
| During ADLs (Activities of Daily Living) |
| Sitting |
| Activities/Therapies |
| Physiotherapy |
| *Id_CauseFall* | Other (Specify in observations) |
| Involvement of third parties |
| Stumble |
| Insufficient lighting |
| Walker |
| Slip |
| Associated symptom |
| Not using prescribed restraints |
| Presence of obstacles |
| Non-use or failure of assistive devices |
| Inappropriate footwear |
| Poor floor conditions |
| Assault by another user |
| Inadequate support in ADLs |
| Startled |
| Bed rails down |
| Id_ConductToFollow | Monitoring/Observation |
| Transfer to nursing bed (UCE) |
| Hospital referral |
| Id_NeurologicalState | Usual baseline condition |
| Conscious and disoriented |
| Agitated/Hyperactive |
| Drowsy/Reduced response to stimuli |
| Unconscious. No response to stimuli |
| *Id_FallLocation* | Room |
| Offices/Consultations |
| Adapted transport |
| Hair salon |
| Room WC |
| Common areas |
| Communal WC |
| Therapy room |
| Dining room |
| Hallway |
| Other (specify where) |
| Stairs |
| Outdoor common areas |
| Reception |
| Physiotherapy room |
| Outside the center |
| Elevator |
| *Id_AssociatedSymptom* | No associated symptoms |
| Dizziness |
| Reduced alertness |
| Gait instability |
| Psychomotor agitation |
| Other (Specify in observations) |
| Sensory deficits |
| Loss of consciousness |
| Due to acute process |
| *Id_TypeOfInjuryFall* | Without consequences |
| Contusion/hematoma |
| Wound |
| Pending hospital diagnosis |
| TBI (Traumatic Brain Injury) |
| Fracture |
| Dislocation |
