# Supplementary figures and images for: Explainable Machine Learning with Bayesian Hyper-Optimization for Predicting Cognitive Impairment from Longitudinal Nursing Home Data
Source: Research Square preprint supplement (doi:10.21203/rs.3.rs-7402937/v1), 2025-09-16

Supplementary Material S1. Description of the variables found in the Fall Records IS.


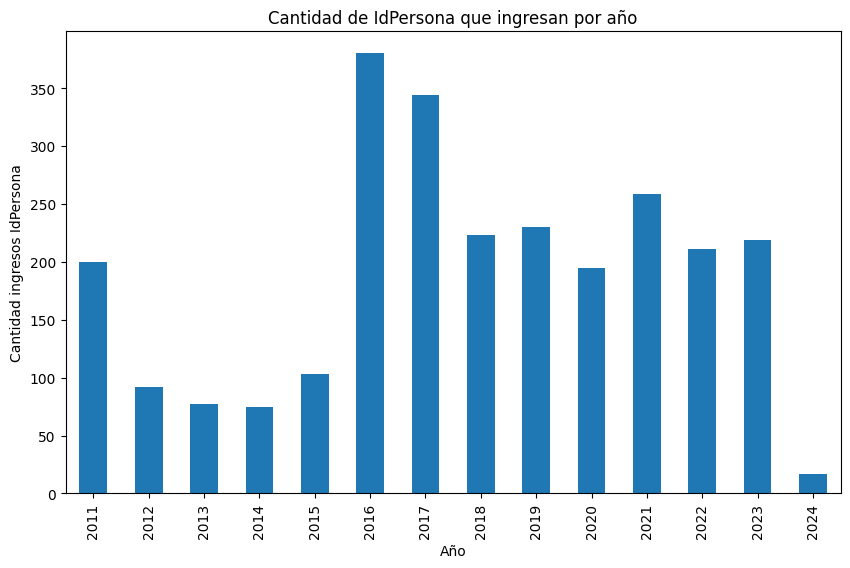

Supplement: Supplementary file 2 [file c493eab9321abc2f58dc5dde.docx]
